# Supplementary material for: An electrically switchable anti-ferroelectric bilayer In2Se3 based opto-spintronic device
Source: Royal Society of Chemistry journal article supplement (doi:10.1039/d1nr00369k), 2021-01-01
Supplement: d1nr00369k1.pdf [file d1nr00369k1.pdf]

## Supplementary Information: Electrically switchable anti-ferroelectric bilayer $\text{In}_2\text{Se}_3$ based opto-spintronics device

Yaqing Yang,<sup>a,d</sup> Liwen Zhang,<sup>a,d</sup> Jun Chen,<sup>b,d</sup> Xiaohong Zheng,<sup>c,a,†</sup> Lei Zhang,<sup>a,d,\*</sup> Liantuan Xiao,<sup>a,d</sup> Suotang Jia<sup>a,d</sup>

---

<sup>a</sup>State Key Laboratory of Quantum Optics and Quantum Optics Devices, Institute of Laser Spectroscopy, Shanxi University, Taiyuan 030006, China

<sup>b</sup>State Key Laboratory of Quantum Optics and Quantum Optics Devices, Institute of Theoretical Physics, Shanxi University, Taiyuan 030006, China

<sup>c</sup>Key Laboratory of Materials Physics, Institute of Solid State Physics, HFIPS, Chinese Academy of Sciences, Hefei 230031, China

<sup>d</sup>Collaborative Innovation Center of Extreme Optics, Shanxi University, Taiyuan 030006, China

\*zhanglei@sxu.edu.cn

†xhzheng@theory.issp.ac.cn

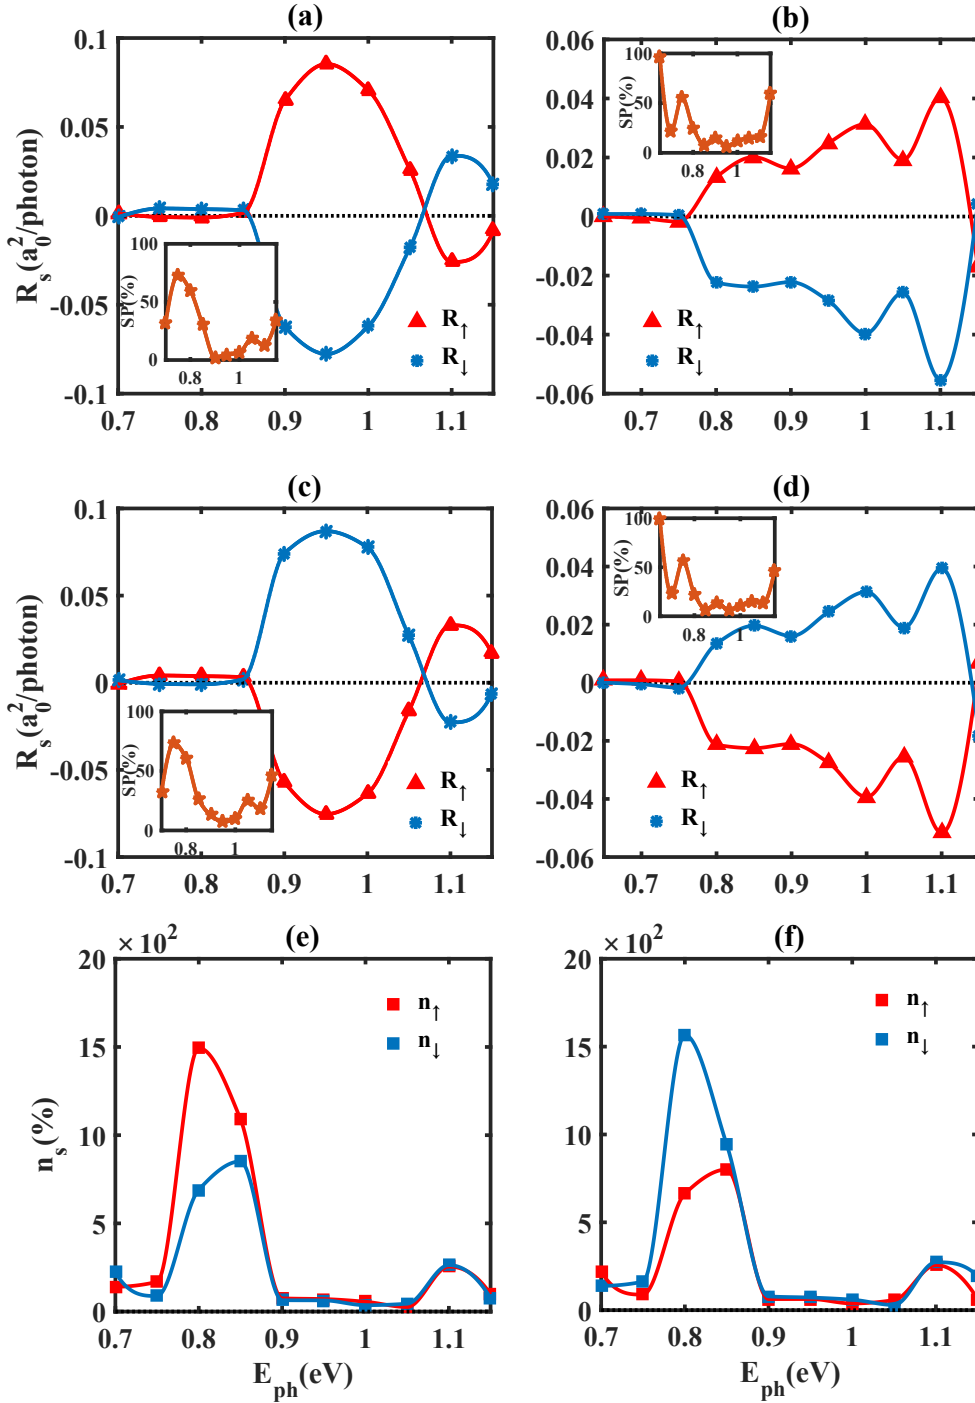

**Figure S1** The spin-dependent photoresponse versus the photon energy  $E_{ph}$  of the circular polarized light. (a,c) The calculated spin dependent photoresponse for atomic structure  $\alpha_{out}$  when the photon polarization is fixed at  $\phi = 45^\circ$  and  $\phi = -45^\circ$ , respectively. (b,d) The calculated spin dependent photoresponse for atomic structure  $\alpha_{in}$  when the photon polarization is fixed at  $\phi = 45^\circ$  and  $\phi = -45^\circ$ , respectively. (e,f) The calculated spin dependent relative photoresponse change  $n_s$  versus the photon energy when the photon polarization is fixed at  $\phi = 45^\circ$  and  $\phi = -45^\circ$ , respectively. Here, the red and blue lines represent the spin up and spin down components. The polarization angle  $\phi$  is fixed  $\phi = 45^\circ$  in (a,c,e) and  $\phi = -45^\circ$  in (b,d,f). The triangle, asterisk and square points are obtained from DFT calculations and the solid lines are fitted curves based on the calculated points.

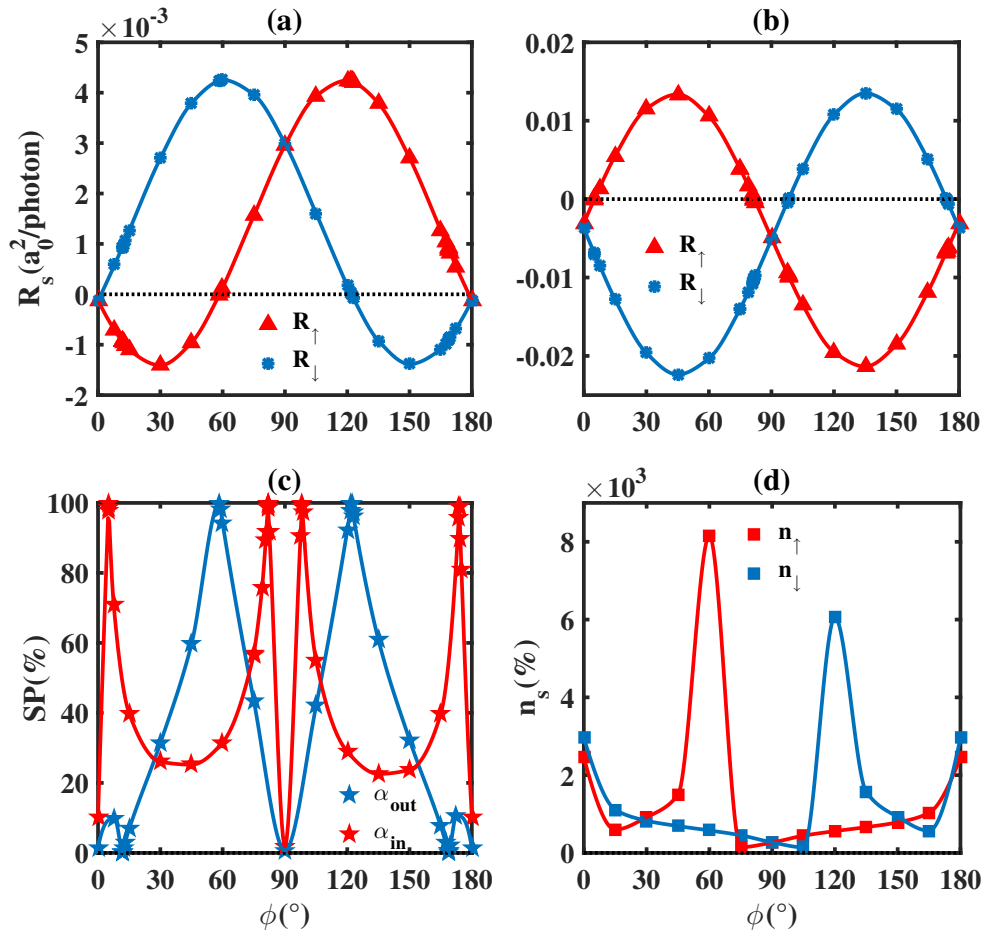

**Figure S2** (a,b) The spin dependent photoresponse versus the polarization angle  $\phi$  of CPGE for two  $\text{In}_2\text{Se}_3$  structures  $\alpha_{out}$  and  $\alpha_{in}$ , respectively. (c) The corresponding spin polarization of structures  $\alpha_{out}$  and  $\alpha_{in}$  versus the polarization angles  $\phi$ . (d) spin dependent relative photoresponse change versus the polarization angles  $\phi$ . The photon energy  $E_{ph}$  is equal to 0.8 eV. The triangle, asterisk and square points are obtained from DFT calculations and the solid lines are fitted curves based on the calculated points.
